# Supplementary material for: The Role of Sarcosine, Uracil, and Kynurenic Acid Metabolism in Urine for Diagnosis and Progression Monitoring of Prostate Cancer
Source: PubMed Central journal article supplement (PMC5372212; doi:10.3390/metabo7010009), 2017-02-23
Supplement: metabolites-07-00009-s001.pdf [file metabolites-07-00009-s001.pdf]

# Supplementary Materials: The Role of Sarcosine, Uracil, and Kynurenic Acid Metabolism in Urine for Diagnosis and Progression Monitoring of Prostate Cancer

Georgios Gkotsos, Christina Virgiliou, Ioanna Lagoudaki, Chrysanthi Sardeli, Nikolaos Raikos, Georgios Theodoridis and Georgios Dimitriadis

Data regarding AUCs, SEs,  $p$  and CIs from Receiver operating characteristic analysis are presented in Tables S1–6

| Table S1               |      |       |       |           |
|------------------------|------|-------|-------|-----------|
| Endogenous metabolites | AUC  | SE    | $p$   | 95% CI    |
| Sarcosine              | 0,47 | 0,052 | 0,554 | 0,37-0,57 |
| Kynurenic acid         | 0,44 | 0,05  | 0,251 | 0,34-0,54 |
| Uracil                 | 0,59 | 0,05  | 0,066 | 0,49-0,69 |

| Table S2               |      |       |       |           |
|------------------------|------|-------|-------|-----------|
| Endogenous metabolites | AUC  | SE    | $p$   | 95% CI    |
| Sarcosine              | 0,38 | 0,057 | 0,044 | 0,27-0,49 |
| Kynurenic acid         | 0,41 | 0,057 | 0,128 | 0,31-0,52 |
| Uracil                 | 0,47 | 0,059 | 0,594 | 0,35-0,58 |

| Table S3               |      |       |       |           |
|------------------------|------|-------|-------|-----------|
| Endogenous metabolites | AUC  | SE    | $p$   | 95% CI    |
| Sarcosine              | 0,46 | 0,059 | 0,473 | 0,34-0,57 |
| Kynurenic acid         | 0,62 | 0,062 | 0,041 | 0,49-0,74 |
| Uracil                 | 0,54 | 0,059 | 0,492 | 0,42-0,66 |

| Table S4               |      |       |       |           |
|------------------------|------|-------|-------|-----------|
| Endogenous metabolites | AUC  | SE    | $p$   | 95% CI    |
| Sarcosine              | 0,48 | 0,064 | 0,819 | 0,36-0,61 |
| Kynurenic acid         | 0,51 | 0,064 | 0,858 | 0,38-0,63 |
| Uracil                 | 0,54 | 0,064 | 0,525 | 0,42-0,67 |

| Table S5               |      |       |          |           |
|------------------------|------|-------|----------|-----------|
| Endogenous metabolites | AUC  | SE    | <i>p</i> | 95% CI    |
| Sarcosine              | 0,51 | 0,081 | 0,927    | 0,35-0,67 |
| Kynurenic acid         | 0,5  | 0,083 | 0,985    | 0,34-0,66 |
| Uracil                 | 0,54 | 0,082 | 0,595    | 0,38-0,71 |

| Table S6               |      |       |          |           |
|------------------------|------|-------|----------|-----------|
| Endogenous metabolites | AUC  | SE    | <i>p</i> | 95% CI    |
| Sarcosine              | 0,52 | 0,081 | 0,84     | 0,36-0,68 |
| Kynurenic acid         | 0,57 | 0,08  | 0,36     | 0,42-0,73 |
| Uracil                 | 0,52 | 0,083 | 0,777    | 0,36-0,69 |

Supplementary Figure S1

a **Sarcosine**

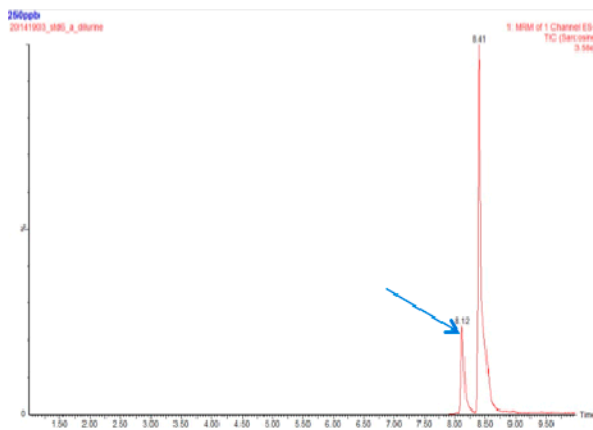

b **Uracil**

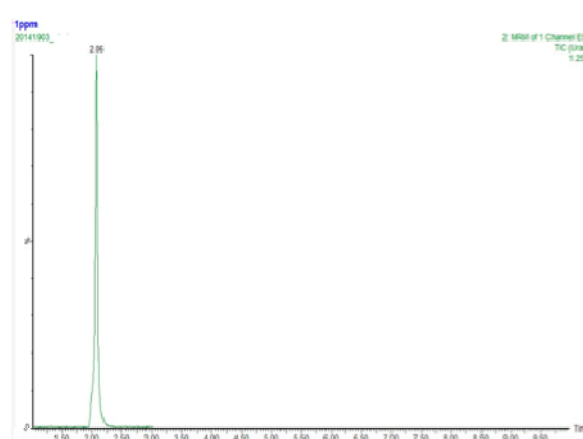

c **Kynurenic acid**

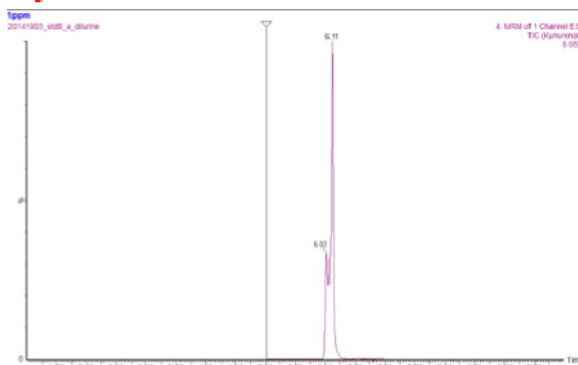

**Figure S1:** Chromatographic peaks of a) sarcosine, b)uracil and c)kynurenic acid in urine samples.
